# Supplementary material for: An accuracy improved ratiometric SERS sensor for rhodamine 6G in chili powder using a metal–organic framework support
Source: Royal Society of Chemistry journal article supplement (doi:10.1039/d3ra00790a), 2023-01-01
Supplement: d3ra00790a1.pdf [file d3ra00790a1.pdf]

## Supplementary Information

### **An accuracy improved ratiometric SERS sensor for rhodamine 6G in chili powder using metal-organic frameworks support**

Yangjie Chen <sup>a, b</sup>, Juan Hao <sup>a, b</sup>, Zhihang Yin <sup>a, b</sup>, Qinghui Wang <sup>b, c</sup>, Youting Zhou <sup>a, b</sup>, Lingpu Jia <sup>b, d</sup>, Huiming Li <sup>b, c</sup>, Wenlong Liao <sup>b, c\*</sup>, Kunping Liu <sup>a, b\*</sup>

<sup>a</sup> Antibiotics Research and Re-Evaluation Key Laboratory of Sichuan Province, Chengdu University, Chengdu 610106, China.

<sup>b</sup> Key Laboratory of Medicinal and Edible Plants Resources Development of Sichuan Education Department, Sichuan Industrial Institute of Antibiotics, Chengdu University, Chengdu 610106, China.

<sup>c</sup> School of Food and Biological Engineering, Chengdu University, Chengdu 610106, China.

<sup>d</sup> Institute for Advanced Study, Chengdu University, Chengdu 610106, China.

\*Corresponding authors.

Tel.: +86-28-8521-6578, Fax: +86-28-8521-6578

E-mail address: liaowenlong@cdu.edu.cn, liukunping@cdu.edu.cn

## **S1 Preparation optimization of Au-MBA@Ag NRs**

10  $\mu\text{L}$  4-MBA ethanol solution (0.1mM) was added to 1 mL Au NRs, and incubated at room temperature overnight. After centrifuged at 12000 rpm for 10 min, the solution was dispersed into 3 mL CTAC (0.02 M). 4, 6, 8, 10, 12, 14  $\mu\text{L}$   $\text{AgNO}_3$  (0.1 M), and 16, 24, 32, 40, 48, 56  $\mu\text{L}$  AA (0.1 M) correspondingly were added to it respectively, stirred for 1 min, 65  $^\circ\text{C}$  water bath for 2.5 h, a series of Au-MBA@Ag NRs solutions with different silver shell thickness from blue-green to orange were obtained, centrifuged at 10000 rpm for 10 min, washed in water, and finally dispersed in 1 mL water. 50  $\mu\text{L}$  R6G solution (10  $\mu\text{M}$ ) was added to 100  $\mu\text{L}$  of the above Au-MBA@Ag NRs solutions, then detect Raman intensity to evaluate the SERS performances of Au-MBA@Ag NRs prepared with different amounts of  $\text{AgNO}_3$ .

## **S2 Optimization of preparation of MOFs based SERS substrate**

1-6 mL MIL-88B-NH<sub>2</sub> aqueous dispersion (1 mg/mL) was mixed with 1 mL Au-MBA@Ag NRs/PSS with the preparation ratio (volume ratio, v/v) changed at 1:1, 2:1, 3:1, 4:1, 5:1, 6:1, respectively. Then, the dispersion was shaken at room temperature for 30 min following with three times of water washing. Finally, the obtained MOFs based SERS substrate of AMAPM was dispersed in 1-6 mL water to and store at 4  $^\circ\text{C}$ .

## **S3 Optimization of the amount of AMAPM**

A certain volume of AMAPM aqueous dispersion (1 mg/mL) was added to 1 mL R6G (1  $\mu\text{M}$ ) and constant volume to 2 mL. After 60 min shaking at room temperature, the dispersion was centrifuged at 8000 rpm for 10 min. Then, 300  $\mu\text{L}$  of supernatant was take to determine the fluorescence intensity and calculate the adsorption efficiency according to the following formula:

$$R = \frac{F_0 - F_1}{F_0} \times 100\%$$

where  $R$  is the adsorption efficiency,  $F_0$  and  $F_1$  are the initial fluorescence intensities of R6G and after adsorption, respectively.

## **S4 Optimization of the adsorption time of AMAPM**

250  $\mu\text{L}$  AMAPM aqueous dispersion (1 mg/mL) was added to 1 mL R6G (1  $\mu\text{M}$ )

and shaken at room temperature for 20-120 min, respectively. After a centrifugation at 8000 rpm for 10 min, 300  $\mu\text{L}$  of supernatant was taken to determine the fluorescence intensity and calculate adsorption efficiency.

### S5 Optimization of pH

The pH of 1  $\mu\text{M}$  R6G was adjusted to 3-9 with dilute hydrochloric acid or sodium hydroxide solution. 250  $\mu\text{L}$  AMAPM aqueous dispersion (1 mg/mL) was added to 1 mL of R6G (1  $\mu\text{M}$ ) with different pH and shaking for 60 min at room temperature. After a centrifugation at 8000 rpm for 10 min, 300  $\mu\text{L}$  of supernatant was taken to determine the fluorescence intensity to calculate adsorption efficiency. Meanwhile, the precipitate was dispersed in 50  $\mu\text{L}$  water for SERS measurement to calculate the ratio of  $I_{1363}/I_{1077}$  for SERS performance evaluation.

### S6 Optimization of ion strength

The ionic strength of 1  $\mu\text{M}$  R6G was adjusted to 0-0.10 mol/L with 1 M NaCl solution and the pH was adjusted to 5. 250  $\mu\text{L}$  of AMAPM (1 mg/mL) was added to 1 mL of R6G with different ionic strengths and shaking for 60 min at room temperature. After a centrifugation at 8000 rpm for 10 min, 300  $\mu\text{L}$  of supernatant was taken to determine the fluorescence intensity to calculate the adsorption efficiency. Meanwhile, the precipitate was dispersed in 50  $\mu\text{L}$  water for SERS measurement to calculate the ratio of  $I_{1363}/I_{1077}$  for SERS performance evaluation.

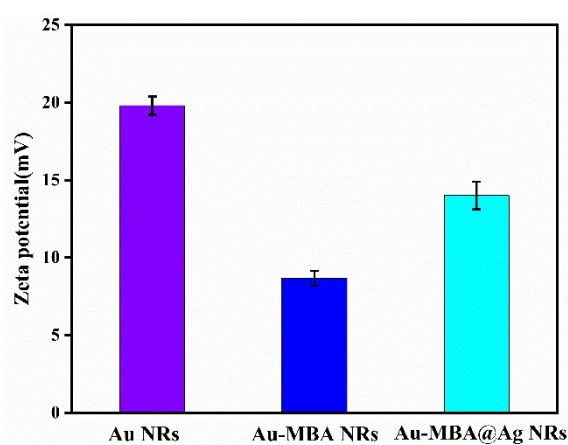

**Figure S1** Zeta potential of Au NRs, Au-MBA NRs, Au-MBA@Ag NRs prepared by 6  $\mu\text{L}$   $\text{AgNO}_3$  (0.1 M) and 24  $\mu\text{L}$  AA (0.1 M).

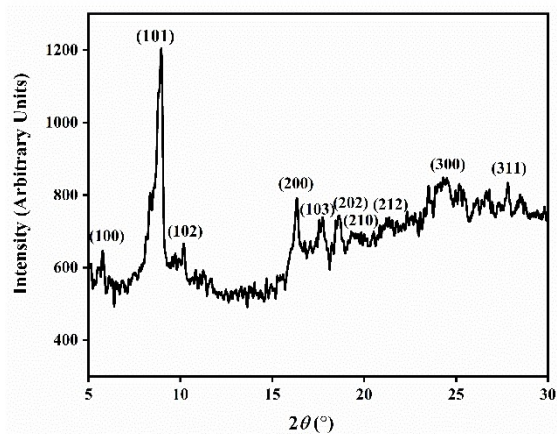

**Figure S2** XRD patterns of MIL-88B-NH<sub>2</sub> (5-30°)

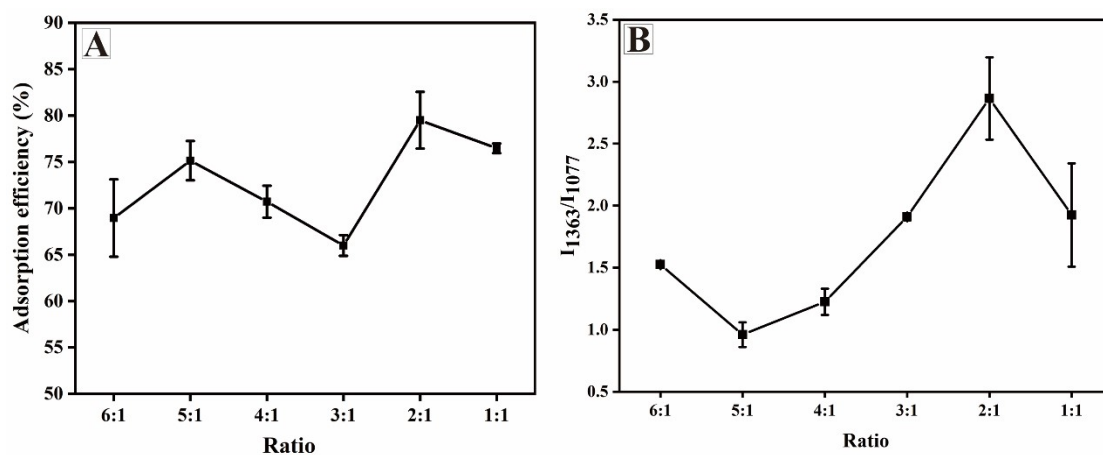

**Figure S3** Effect of preparation ratio of functionalized MOFs on adsorption efficiency (A) and SERS performance (B) of R6G.

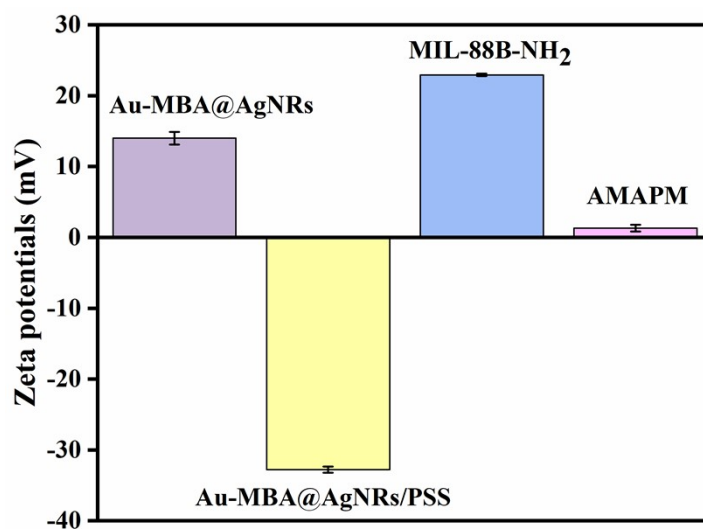

**Figure S4** Zeta potentials of Au-MBA@Ag NRs, Au-MBA@Ag NRs/PSS, MIL-88B-NH<sub>2</sub> and

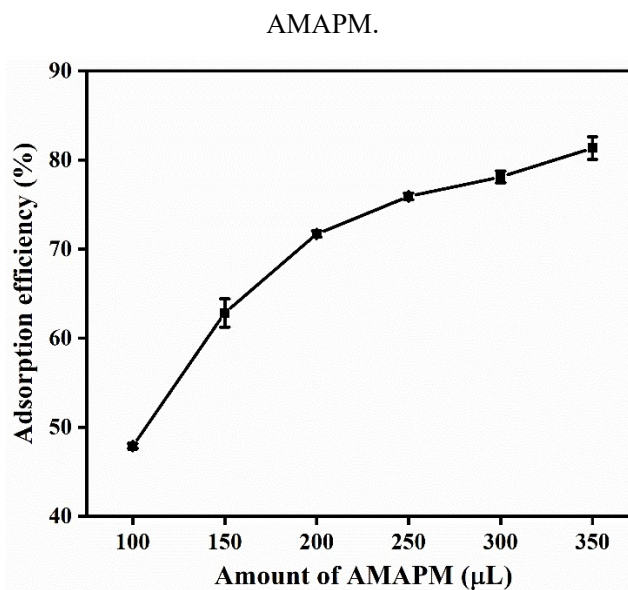

**Figure S5** Effect of AMAPM amount on adsorption efficiency of R6G.

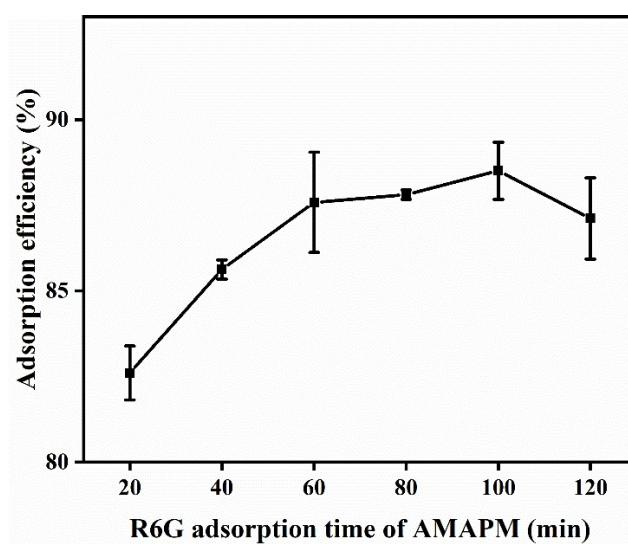

**Figure S6** Effect of R6G adsorption time of AMAPM for the adsorption efficiency of R6G.

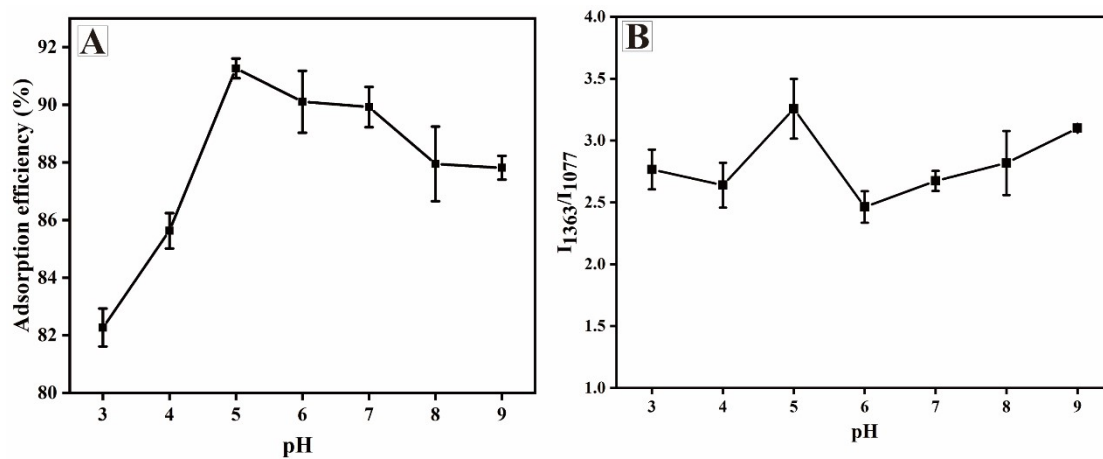

**Figure S7** Effect of pH on adsorption efficiency (A) and SERS performance (B) of R6G.

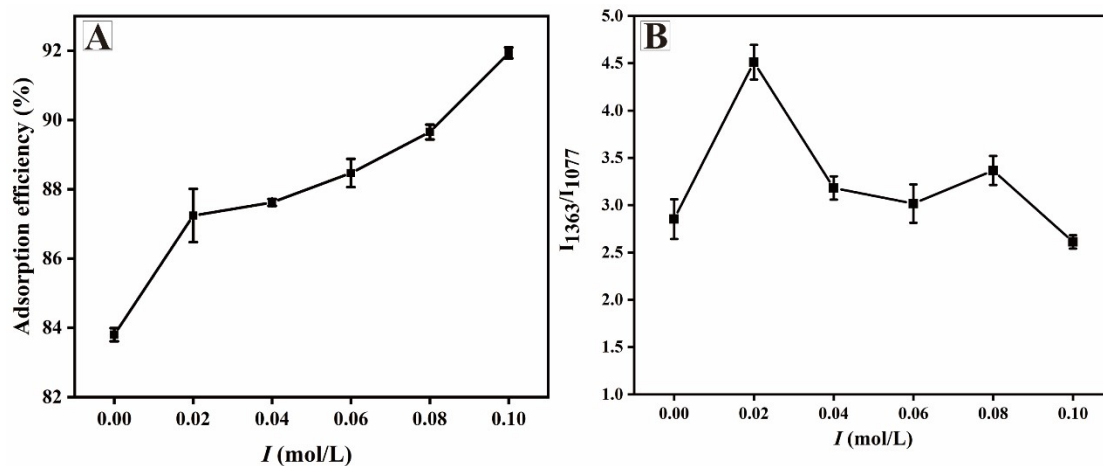

**Figure S8** Effect of ion strength ( $I$ ) on adsorption efficiency (A) and SERS performance (B) of R6G.

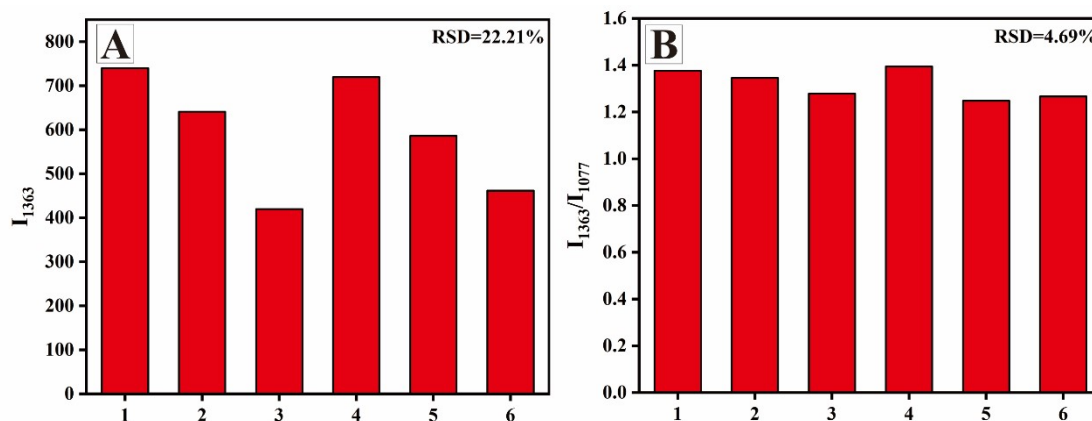

**Figure S9** (A)  $I_{1363}$  and (B)  $I_{1363}/I_{1077}$  obtained in 6 detections of R6G (80 nM).

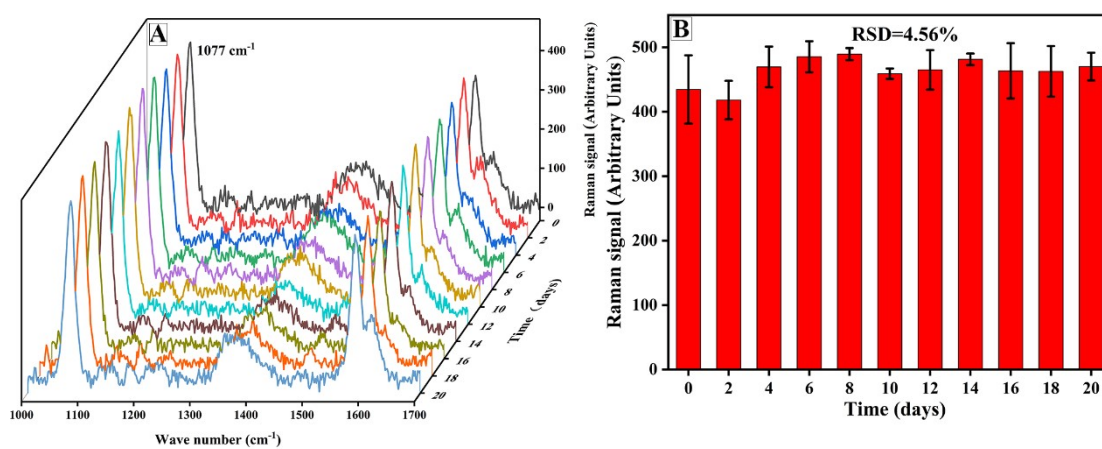

**Figure S10** (A) The SERS spectra and (B) the SERS signals intensity at 1077  $\text{cm}^{-1}$  of AMAPM SERS substrate stored at 4 °C for different days.

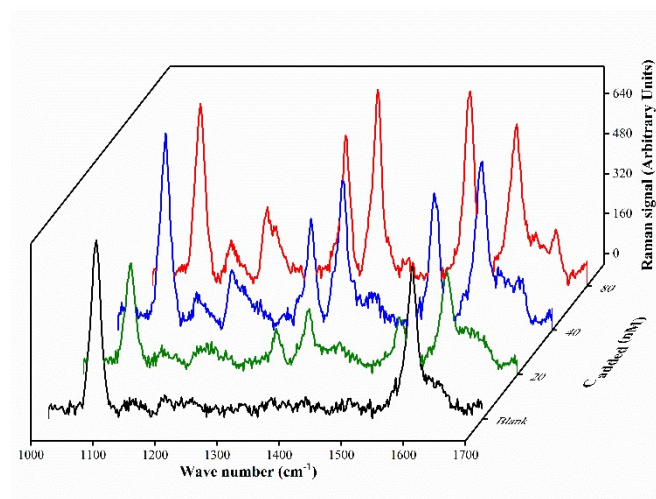

**Figure S11** The actual SERS spectra of the real sample and spiked samples of chilli powder.

**Table S1** Comparison of analytical performances of various detection methods of R6G.

| Methods      | Nanoparticles                                  | Linear Range            | LOD (nM) | Reference |
|--------------|------------------------------------------------|-------------------------|----------|-----------|
| UV-Vis       | -                                              | 5-900 ng/mL             | 4.99     | 1         |
| HPLC-Vis     | -                                              | 10-1000 µg/mL           | 4.97     | 2         |
| Fluorescence | AIE-MIPs-1                                     | 0-10 µM                 | 260      | 3         |
| SERS         | Au/DW                                          | $10^{-7}$ - $10^{-3}$ M | 100      | 4         |
| SERS         | Ag NWs network                                 | $10^{-7}$ - $10^{-6}$ M | 100      | 5         |
| SERS         | GO/Ag/PSi                                      | $10^{-7}$ - $10^{-4}$ M | 100      | 6         |
| SERS         | Fe <sub>3</sub> O <sub>4</sub> @Au@MIL-100(Fe) | $10^{-9}$ - $10^{-5}$ M | 1        | 7         |
| SERS         | AMAPM                                          | 5-320 nM                | 2.29     | This work |

## References

1. Biparva, P.; Ranjbari, E.; Hadjmohammadi, M. R., Application of dispersive liquid–liquid microextraction and spectrophotometric detection to the rapid determination of rhodamine 6G in industrial effluents. *Analytica Chimica Acta* 2010, **674**(2), 206-210.
2. Chao Y. H.; Pang J. Y.; Bai Y.; Wu P. W.; Luo J.; He J.; Jin Y.; Li X. W.; Xiong J.; Li H. M.; Zhu W. S. Graphene-like BN@SiO<sub>2</sub> nanocomposites as efficient sorbents for solidphase extraction of Rhodamine B and Rhodamine 6G from food samples. *Food Chemistry* 2020, **320**, 126666.
3. Li, Y.; He, W.; Peng, Q.; Hou, L.; He, J.; Li, K., Aggregation-induced emission luminogen based molecularly imprinted ratiometric fluorescence sensor for the detection of Rhodamine 6G in

food samples. *Food Chemistry* 2019, **287**, 55-60.

4. Shi, G. C.; Wang, M. L.; Zhu, Y. Y.; Shen, L.; Ma, W. L.; Wang, Y. H.; Li, R. F. J. S. R., Dragonfly wing decorated by gold nanoislands as flexible and stable substrates for surface-enhanced Raman scattering (SERS). 2018, **8**(1), 1-11.
5. Liu, D.; Yang, H.; Chen, X.; Ma, Y.; Liu, Q.; Li, J.; He, D. J. A. M. I., Self-Support Surface Enhanced Raman Scattering Substrates with the Function of Enriching Analytes. 2018, **5**(18), 1800559.
6. Zhang, C.; Jiang, S.; Huo, Y.; Liu, A.; Xu, S.; Liu, X.; Sun, Z.; Xu, Y.; Li, Z.; Man, B. J. O. e., SERS detection of R6G based on a novel graphene oxide/silver nanoparticles/silicon pyramid arrays structure. 2015, **23**(19), 24811-24821.
7. Ma, X.; Wen, S.; Xue, X.; Guo, Y.; Jin, J.; Song, W.; Zhao, B., Controllable Synthesis of SERS-Active Magnetic Metal–Organic Framework-Based Nanocatalysts and Their Application in Photoinduced Enhanced Catalytic Oxidation. *ACS Applied Materials & Interfaces* 2018, **10**(30), 25726-25736.
